# Supplementary material for: Peripheral blood lymphocyte-to-monocyte ratio as a prognostic factor in advanced epithelial ovarian cancer: a multicenter retrospective study
Source: PubMed Central journal article supplement — J Cancer. 2017 Feb 25;8(5):737–43. doi: 10.7150/jca.17668 (PMC5381161; doi:10.7150/jca.17668), 2017-02-25

Supplementary Figure S1: ROC curve analysis for the sensitivity and specificity of LMR and CA-125 levels in predicting survival. The sensitivity was 76.0% and the specificity was 86.7% using the cut-off point of 3.45 for LMR, and the area under the ROC curve (AUC) was 0.813 (95% CI, 0.779-0.847). When 35 U/mL was chosen as the cutoff value, the sensitivity and specificity for CA-125 level were 79.8% and 73.6%, respectively, with an AUC value of 0.767 (95% CI, 0.730-0.804).

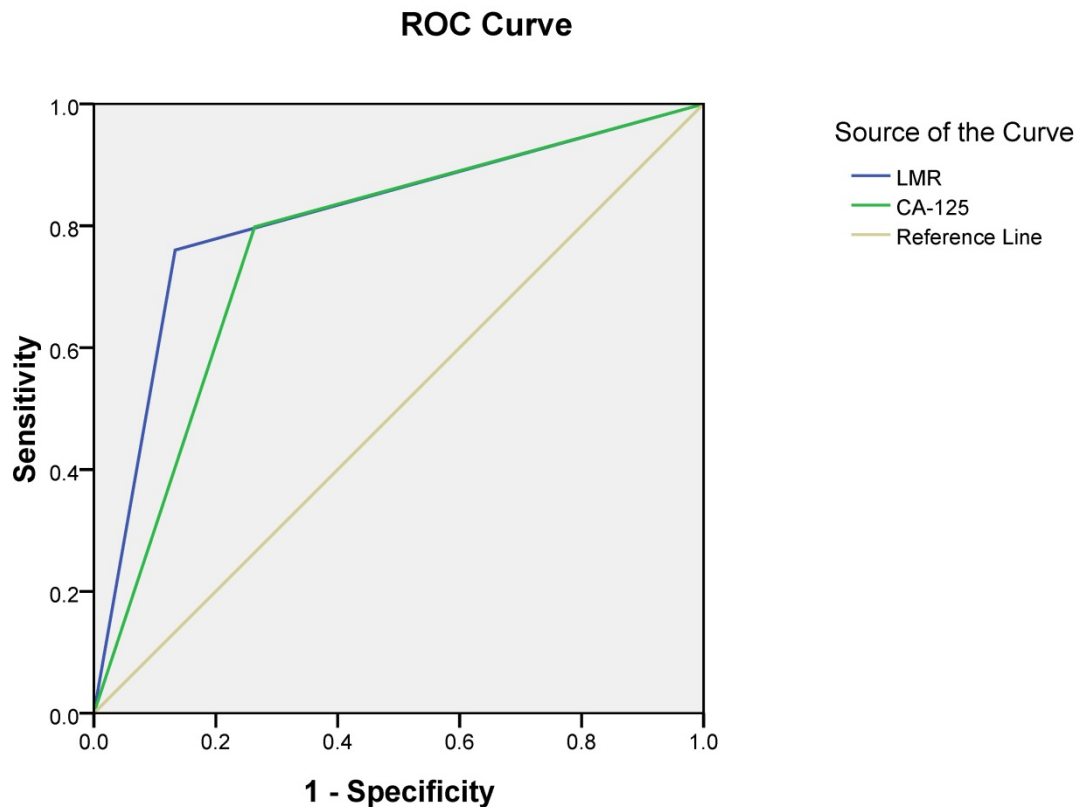

Supplement: jcav08p0737s1.pdf [file jcav08p0737s1.pdf]
